# Supplementary material for: The Senescence-associated Secretory Phenotype Mediates Oncogene-induced Senescence in Pediatric Pilocytic Astrocytoma
Source: Oxford University Press journal article supplement (doi:10.1158/1078-0432.ccr-18-1965), 2018-12-07
Supplement: 10780432ccr181965-sup-203827_2_supp_5187076_psv0g9.xlsx [file 10780432ccr181965-sup-203827_2_supp_5187076_psv0g9.xlsx]

## Sheet: Tabelle1
Primers
gene name	cataloge number	company
IL1B	QT00021385	Qiagen, Hilden, Germany
IL6	QT00083720	Qiagen, Hilden, Germany
TNFRSF1B	QT00029232	Qiagen, Hilden, Germany
IL1R1	QT00081263	Qiagen, Hilden, Germany
IL6R	QT00023660	Qiagen, Hilden, Germany
Antibodies
name	dilution (1:x)	cataloge number	company	membrane	RRID
monoclonal mouse anti-human IRAK1	200	sc-5288	Santa Cruz, Dallas, TX, USA	PVDF	AB_2249106
monoclonal rabbit anti-human IL1B	1000	ab9722	abcam, Cambridge, UK	PVDF	AB_308765
monoclonal mouse anti-human phosho-STAT3 Tyr705	1000	9138	Cell Signaling, Danvers, MA, USA	PVDF	AB_331262
polyclonal rabbit anti-human IL1R1	100	sc-688	Santa Cruz	nitrocellulose	AB_2124918
monoclonal mouse anti-human STAT3	1000	9139	Cell Signaling	PVDF	AB_331757
polyclonal rabbit IL6Ra	200	sc-661	Santa Cruz	PVDF	AB_2127925
monoclonal mouse anti-SV40 large T antigen	1000	ab80564	abcam	PVDF	AB_1641094
monoclonal mouse anti-p21 (CDKN1A)	200	sc-6246	Santa Cruz	PVDF	AB_628073
monoclonal rabbit anti-NF-kB p65 Clone C22B4 (RELA)	1000	4764S	Cell Signaling	PVDF	AB_823578
monoclonal rabbit anti-Phospho-NF-kB p65 Ser536 Clone 93H1 (p-RELA)	1000	3033S	Cell Signaling	PVDF	AB_331284
monoclonal mouse anti-β-actin	1000	A5441	Sigma-Aldrich, St. Louis, MO, USA	PVDF	AB_476744
