# Supplementary material for: The Senescence-associated Secretory Phenotype Mediates Oncogene-induced Senescence in Pediatric Pilocytic Astrocytoma
Source: Oxford University Press journal article supplement (doi:10.1158/1078-0432.ccr-18-1965), 2018-12-07
Supplement: 10780432ccr181965-sup-203827_2_supp_5199752_pj69z8.docx [file 10780432ccr181965-sup-203827_2_supp_5199752_pj69z8.docx]

**Supplementary table legends**

**Suppl. table 1. Primers & Antibodies**

**Suppl. table 2. Clinical annotations of the multiplex assay PA cohort and normal brain**

**Suppl. table 3. GEP results of SASP in DKFZ-BT66 in OIS vs. proliferation**

**Suppl. table 4. Clinical annotation of the PA patient cohort**

**Suppl. table 5. IPA upstream regulators**

**Suppl. table 6. Uni- and multivariate analysis of *IL1B* and SASP in the PA cohort**
